# Supplementary material
Source: publisher site journal article supplement (https://www.spandidos-publications.com/5905/downloadSupplementary)
Supplement: Supplementary file 1 [file downloadSupplementary]

Table SI. Primers used for reverse transcription-quantitative PCR.

| Gene     | Primer                                                                           |
|----------|----------------------------------------------------------------------------------|
| Ccl20    | Forward: 5'-CTGTGTGCGCTGATCCAAAG-3'<br>Reverse: 5'-CTTCTTGACTCTTAGGCTGAGGA-3'    |
| Mmp9     | Forward: 5'-CAGCCGACTTTTGTGGTCTTC-3'<br>Reverse: 5'-CGGTACAAGTATGCCTCTGCCA-3'    |
| Cdk1     | Forward: 5'-CCGTTGCACTGGTTTGACAG-3'<br>Reverse: 5'-ACTCACTTCCCTCAGTGCG-3'        |
| Clic6    | Forward: 5'-GAAGAGTTGGGGCGAGTGAA-3'<br>Reverse: 5'-GCCGTCATAACCAGCCTTGA-3'       |
| Colla1   | Forward: 5'-CCCTGGTCCCTCTGGAAATG-3'<br>Reverse: 5'-GGACCTTTGCCCCCTTCTTT-3'       |
| Coll1a1  | Forward: 5'-CCCAAGGCAGCATACTGACTA-3'<br>Reverse: 5'-TCCTCAGGTGCATACTCATCA-3'     |
| Comp     | Forward: 5'-AGTTGGCTACATCAGGGTGC-3'<br>Reverse: 5'-CGCAGGTTAGCCAGATGAT-3'        |
| Cxcl10   | Forward: 5'-CCACGTGTTGAGATCATTGCC-3'<br>Reverse: 5'-GAGGCTCTCTGCTGTCCATC-3'      |
| Apoc2    | Forward: 5'-GCTTTGTTGGCCAGGACTTT-3'<br>Reverse: 5'-ATGCTGTCTGGGACCTGAATG-3'      |
| Fgf23    | Forward: 5'-TTCTACACTGTTCGCCACG-3'<br>Reverse: 5'-CTTTCTTCGACTTGCAGGCAC-3'       |
| Gdf15    | Forward: 5'-CCTCCATCTTCTATCTGAGCCTG-3'<br>Reverse: 5'-CCATGTCGCTTGTGTCCTTTC-3'   |
| Gstp1    | Forward: 5'-TCTACGCAGCACTGAATCCG-3'<br>Reverse: 5'-GGAGCTGCCCATACAGACAA-3'       |
| Lama2    | Forward: 5'-TGAGTATGAAAGCAAGGCCAGA-3'<br>Reverse: 5'-AAGCTCCACAAAACCAGGCT-3'     |
| Itgb11   | Forward: 5'-CTCCAGATGGCAAAGTCTGT-3'<br>Reverse: 5'-GTTACACTGCCCATGACCTGA-3'      |
| Il1rn    | Forward: 5'-TAGACATGGTGCCTATTGACCT-3'<br>Reverse: 5'-TCGTGACTATAAGGGGCTCTTC-3'   |
| Serpine1 | Forward: 5'-TCTGGGAAAGGGTTCACCTTACC-3'<br>Reverse: 5'-GACACGCCATAGGGAGAGAAG-3'   |
| Apoa4    | Forward: 5'-GGCCAATGTGGTGTGGGATT-3'<br>Reverse: 5'-TGTCCTGGAAGAGGGTACTGAG-3'     |
| Trem2    | Forward: 5'-CTGGAACCGTCACCATCACTC-3'<br>Reverse: 5'-CGAAACTCGATGACTCCTCGG-3'     |
| Itgax    | Forward: 5'-CTGGATAGCCTTTCTTCTGCTG-3'<br>Reverse: 5'-GCACACTGTGTCCGAACTCA-3'     |
| Vcan     | Forward: 5'-TTTTACCCGAGTTACCAGACTCA-3'<br>Reverse: 5'-GGAGTAGTTGTTACATCCGTTGC-3' |
| Igfbp2   | Forward: 5'-GCAGACCTCGGGTGAGAAAA-3'<br>Reverse: 5'-TCGTCATCACTGTCTCCCAAC-3'      |
| Akr1d1   | Forward: 5'-AATGTTCTTGAGCCAGGAGCC-3'<br>Reverse: 5'-ACATGGACTCCACCCAGCAATG-3'    |
| Plin1    | Forward: 5'-CTGTGTGCAATGCCTATGAGA-3'<br>Reverse: 5'-CTGGAGGGTATTGAAGAGCCG-3'     |
| Cxcl14   | Forward: 5'-ACTGCTGCTTAAAGGACTTGG-3'                                             |

|       |                                        |
|-------|----------------------------------------|
|       | Reverse: 5'-CACGCATCTGTCCCGTCAAA-3'    |
| Pklr  | Forward: 5'-CCGAGATACGCACTGGAGTC-3'    |
|       | Reverse: 5'-CTGTGTGGCACAAACGACAG-3'    |
| Enho  | Forward: 5'-CAATGGCCTCGTAGGCTTCT-3'    |
|       | Reverse: 5'-CTTGATCCGATTCCACGCT-3'     |
| Pon3  | Forward: 5'-AACTGCCACCTGATTGAGGG-3'    |
|       | Reverse: 5'-AAAGTGCTGATCCCGTGAGG-3'    |
| Gapdh | Forward: 5'-AGGTCGGTGTGAACGGATTTG-3'   |
|       | Reverse: 5'-TGTAGACCATGTAGTTGAGGTCA-3' |

---

Ccl20, C-C motif chemokine ligand 20; Cdk1, cyclin-dependent kinase 1; Clic6, Clic6 chloride intracellular channel 6; Colla1, collagen type I  $\alpha$ 1 chain; Comp: cartilage oligomeric matrix protein; Cxcl10, C-X-C motif chemokine ligand 10; Apoc2, apolipoprotein C2; Fgf23, fibroblast growth factor 23; Gdf15, growth differentiation factor 15; Gstp1, glutathione S-transferase  $\pi$ 1; Lama2, laminin subunit  $\alpha$ 2; Itgb11, integrin subunit  $\beta$ -like 1; Il1rn, interleukin 1 receptor antagonist; Serpine1, serpin family E member 1; Trem2: triggering receptor expressed on myeloid cells 2; Vcan, versican; Igfbp2: insulin-like growth factor binding protein 2; Akrl1d1, aldo-keto reductase family 1 member D1; Plin1, perilipin 1; Pklr, pyruvate kinase liver and red blood cell; Enho, energy homeostasis-associated; Pon3, paraoxonase3.
